# Supplementary material for: A novel CT scoring method predicts the prognosis of interstitial lung disease associated with anti-MDA5 positive dermatomyositis
Source: PubMed Central journal article supplement (PMC8382835; doi:10.1038/s41598-021-96292-w), 2021-08-23
Supplement: 41598_2021_96292_MOESM1_ESM.pdf [file 41598_2021_96292_MOESM1_ESM.pdf]

**Running head:** Lung CT scoring for MDA5+DM-ILD

A novel CT scoring method predicts the prognosis of interstitial lung disease associated with anti-MDA5 positive dermatomyositis

Wenwen Xu, M.D.<sup>1</sup>, Wanlong Wu, M.D.<sup>1</sup>, Danting Zhang, M.M.<sup>1</sup>, Zhiwei Chen, M.M.<sup>1</sup>, Xinwei Tao, M.M.<sup>2</sup>, Jiangfeng Zhao, M.M.<sup>1</sup>, Kaiwen Wang, M.M.<sup>1</sup>, Xiaodong Wang, M.D.<sup>1</sup>, Yu Zheng, M.M.<sup>3\*</sup>, Shuang Ye, M.D.<sup>1\*</sup>

<sup>1</sup> Department of Rheumatology, Shanghai Jiao Tong University School of Medicine Affiliated Renji Hospital, Shanghai, China

<sup>2</sup> CT scientific collaboration, Siemens Healthineers, Shanghai, China

<sup>3</sup> Department of Pulmonology, Shanghai Jiao Tong University School of Medicine Affiliated Renji Hospital, Shanghai, China

Wenwen Xu, and Wanlong Wu contributed equally to this article as co-first authors.

**Address correspondence to**

Dr. Shuang Ye, Department of Rheumatology, Shanghai Jiao Tong University School of Medicine Affiliated Renji Hospital, No. 2000 Jiangyue Road, 201112, Shanghai, China, E-mail address: ye\_shuang2000@163.com;

Dr. Yu Zheng, Department of Pulmonology, Shanghai Jiao Tong University School of Medicine Affiliated Renji Hospital, No. 2000 Jiangyue Road, 201112, Shanghai, China, E-mail address: drzhengyu@yahoo.com.

Supplementary Table S1: Comparison of baseline clinical features, treatment and outcomes between derivation and validation datasets.

| <b>Characteristics</b>                  | <b>Derivation dataset<br/>(n=116)</b> | <b>Validation dataset<br/>(n=57)</b> | <b>P-value</b> |
|-----------------------------------------|---------------------------------------|--------------------------------------|----------------|
| six-month mortality                     | 47 (40.5)                             | 21 (36.8)                            | 0.764          |
| <b>Demographic</b>                      |                                       |                                      |                |
| Male sex                                | 38 (32.8)                             | 26 (45.6)                            | 0.139          |
| Age, years                              | 50 [42-59]                            | 52 [45-58]                           | 0.408          |
| DM course*, month                       | 2 [2-4]                               | 2 [2-3]                              | 0.263          |
| ILD course†, week                       | 4 [2-8]                               | 5 [3-8]                              | 0.078          |
| <b>Extrapulmonary symptoms</b>          |                                       |                                      |                |
| Fever                                   | 72 (62.1)                             | 42 (73.7)                            | 0.179          |
| Heliotrope sign                         | 101 (87.1)                            | 46 (80.7)                            | 0.381          |
| Gottron sign                            | 97 (83.6)                             | 45 (78.9)                            | 0.588          |
| Skin ulcer                              | 22 (19.0)                             | 9 (15.8)                             | 0.763          |
| Dysphagia                               | 16 (13.8)                             | 10 (17.5)                            | 0.673          |
| <b>Respiratory function</b>             |                                       |                                      |                |
| FVC% <50%                               | 47 (41.2)                             | 30 (52.6)                            | 0.211          |
| PaO <sub>2</sub> /FiO <sub>2</sub> <200 | 15 (12.9)                             | 12 (21.1)                            | 0.246          |
| <b>Laboratory data</b>                  |                                       |                                      |                |
| CRP, mg/L                               | 3.7 [0.4-9.6]                         | 4.8 [0-17.9]                         | 0.387          |
| ESR, mm/H                               | 33 [15-47]                            | 30 [14-51]                           | 0.946          |
| Serum ferritin, ng/mL                   | 927 [385-1535]                        | 1289 [561-2672]                      | 0.054          |
| LDH, U/L                                | 318 [248-442]                         | 346 [276-503]                        | 0.153          |
| Lymphocyte, 10 <sup>9</sup> /L          | 0.7 [0.5-1.1]                         | 0.7 [0.3-0.9]                        | 0.07           |
| Ckmax, U/L                              | 99 [43-279]                           | 139 [38-338]                         | 0.276          |
| ALT, U/L                                | 57 [35-101]                           | 73 [44-122]                          | 0.059          |
| AST, U/L                                | 54 [33-104]                           | 63 [40-123]                          | 0.201          |
| CEA, ng/mL                              | 6.3 [2.8-11.7]                        | 7.6 [5.2-12.0]                       | 0.064          |
| Anti-Ro52 Ab positive                   | 68 (58.6)                             | 40 (70.2)                            | 0.191          |
| Anti-MDA5 Ab titer, RU/mL               | 181 [153-228]                         | 185 [149-229]                        | 0.943          |
| <b>Treatment</b>                        |                                       |                                      |                |
| Max dosage of MP, mg/d                  | 120 [60-200]                          | 80 [80-240]                          | 0.979          |
| MP pulse therapy                        | 13 (11.2)                             | 5 (8.8)                              | 0.82           |
| Exposure to IS <sup>‡</sup>             |                                       |                                      |                |
| 1 IS                                    | 45 (38.8)                             | 22 (38.6)                            | 1              |
| ≥2 IS                                   | 57 (49.1)                             | 35 (61.4)                            | 0.175          |
| Exposure to pirfenidone or nintedanib   | 52 (44.8)                             | 26 (45.6)                            | 1              |

Data are presented as median [IQR] for continuous variables and number (frequency) (%) for categorical variables.

\*DM course, time from the first symptom of dermatomyositis (DM) to admission;

†ILD course, time from the first abnormal pulmonary CT which revealed ILD changes to admission;

‡IS, immunosuppressant drugs, include cyclophosphamide, cyclosporine, tacrolimus, mycophenolate mofetil, tofacitinib, rituximab, basiliximab, and tocilizumab.

FVC%, forced vital capacity percentage of predicted; PaO<sub>2</sub>/FiO<sub>2</sub>, arterial oxygen/fraction of inspiration oxygen; CRP, C-reactive protein; ESR, erythrocyte sedimentation rate; LDH, lactate dehydrogenase; CKmax, maximum creatine kinase from disease onset to admission; ALT, alanine transaminase; AST, aspartate transaminase; CEA, carcinoembryonic antigen; MDA5, melanoma differentiation-associated protein 5; Ab, antibody; MP, methylprednisolone.

Supplementary Table S2: Comparison of six domains calculating for IPF score between two datasets with different outcome.

|                    | Derivation dataset |                  |                      |          | Validation dataset |                  |                      |          | p-value <sup>†</sup> |
|--------------------|--------------------|------------------|----------------------|----------|--------------------|------------------|----------------------|----------|----------------------|
|                    | All (n=116)        | Survivors (n=69) | Non-survivors (n=47) | p-value* | All (n=57)         | Survivors (n=36) | Non-survivors (n=21) | p-value* |                      |
| Normal attenuation | 74.8±18.0          | 81.8±13.9        | 64.7±18.7            | <0.001   | 69.4±22.9          | 77.0±19.9        | 56.4±22.0            | <0.001   | 0.14                 |
| GGO without TBE    | 16.6±13.2          | 12.8±10.6        | 22.4±14.7            | <0.001   | 19.7±16.7          | 15.6±15.8        | 26.7±16.0            | 0.002    | 0.36                 |
| CON without TBE    | 7.0±5.9            | 4.4±3.4          | 10.9±6.6             | <0.001   | 9.7±7.1            | 7.2±5.5          | 14.0±7.5             | <0.001   | 0.01                 |
| GGO with TBE       | 1.0±3.0            | 0.6±2.2          | 1.6±3.8              | 0.07     | 0.6±1.6            | 0.2±0.5          | 1.3±2.5              | 0.001    | 0.68                 |
| CON with TBE       | 0.4±1.3            | 0.4±1.2          | 0.5±1.4              | 0.4      | 0.5±1.7            | 0.0±0.2          | 1.3±2.7              | <0.001   | 0.33                 |
| honeycombing       | 0                  | 0                | 0                    | 1        | 0                  | 0                | 0                    | 1        | 1                    |

Data are presented as mean ± SD for continuous variables.

\* A comparison between the survivors and non-survivors groups.

† A comparison between the derivation and validation datasets.

GGO, ground-glass opacity; CON, consolidation; TBE, traction bronchiectasis.
